# Supplementary material for: Perinatal mental health literacy: knowledge, attitudes, and help-seeking among perinatal women and the public – a systematic review
Source: Springer Nature journal article supplement (doi:10.1186/s12884-022-04865-y), 2022-07-19
Supplement: MOESM2 [file 23283228]

Perinatal mental health literacy: Knowledge, attitudes, and help-seeking among perinatal women and the public – a systematic review

**Search Terms**

1. WEB OF SCIENCE SEARCH TERMS

| No.              | Term                                                                                                                                                                   | Hits (date: 01.09.2020) | Notes     |
|------------------|------------------------------------------------------------------------------------------------------------------------------------------------------------------------|-------------------------|-----------|
| <b>CONCEPT 1</b> |                                                                                                                                                                        |                         |           |
| #1               | “Mental health literacy” OR “Health literacy” OR literacy OR knowledge OR attitude* OR belief* OR stigma* OR “help-seek*” [Topic]                                      | 2,065,570               | CONCEPT 1 |
| <b>CONCEPT 2</b> |                                                                                                                                                                        |                         |           |
| #2               | prenatal OR antenatal OR pregnancy OR “before birth” OR postnatal OR postpartum OR “after birth” OR peripartum OR perinatal [Topic]                                    | 694,427                 | CONCEPT 2 |
| <b>CONCEPT 3</b> |                                                                                                                                                                        |                         |           |
| #3               | “mental health” OR “mental illness” OR “mental disorder” OR “psychiatric disorder” OR depression OR anxiety OR “baby blues” OR psychosis OR “bipolar disorder” [Topic] | 916,327                 | CONCEPT 3 |
| #4               | #1 AND #2 AND #3 (No Filter)                                                                                                                                           | 3,346                   |           |
| #5               | #1 AND #2 AND #3 (with filter) <ul style="list-style-type: none"> <li>English and German</li> </ul>                                                                    | 3,185                   |           |

2. PUB MED SEARCH TERMS

| No.              | Term                                                                                                                             | Hits (date: 01.09.2020) |           |
|------------------|----------------------------------------------------------------------------------------------------------------------------------|-------------------------|-----------|
| <b>CONCEPT 1</b> |                                                                                                                                  |                         |           |
| #1               | “Health Literacy” [Mesh]                                                                                                         | 5,975                   |           |
| #2               | “Health Knowledge, Attitudes, Practice” [Mesh]                                                                                   | 111,940                 |           |
| #3               | “Health education” [Mesh]                                                                                                        | 244,278                 |           |
| #4               | “Attitude to health” [Mesh]                                                                                                      | 418,910                 |           |
| #5               | “Help-Seeking Behavior” [Mesh]                                                                                                   | 777                     |           |
| #6               | #1 OR #2 OR #3 OR #4 OR #5                                                                                                       | 607,837                 |           |
| #7               | “Mental health literacy” OR “Health literacy” OR literacy OR knowledge OR attitude* OR belief* OR stigma* OR “help-seek*” [TIAB] | 920,772                 |           |
| #8               | #6 OR #7                                                                                                                         | 1,398,104               | Concept 1 |

| CONCEPT 2 |                                                                                                                                                                       |           |           |
|-----------|-----------------------------------------------------------------------------------------------------------------------------------------------------------------------|-----------|-----------|
| #9        | “Postpartum Period” [Mesh]                                                                                                                                            | 65,200    |           |
| #10       | “Pregnancy” [Mesh]                                                                                                                                                    | 895,913   |           |
| #11       | 9# OR #10                                                                                                                                                             | 918,403   |           |
| #12       | prenatal OR antenatal OR pregnancy OR “before birth” OR postnatal OR postpartum OR “after birth” OR peripartum OR perinatal [TIAB]                                    | 673,243   |           |
| #13       | #11 OR # 12                                                                                                                                                           | 1,157,333 | Concept 2 |
| CONCEPT 3 |                                                                                                                                                                       |           |           |
| #14       | "Depression"[Mesh]                                                                                                                                                    | 119,760   |           |
| #15       | "Anxiety"[Mesh]                                                                                                                                                       | 85,659    |           |
| #16       | “Mental Disorders” [Mesh]                                                                                                                                             | 1,243,983 |           |
| #17       | “Mental Health” [Mesh]                                                                                                                                                | 38,814    |           |
| #18       | #14 OR #15 OR #16 OR #17                                                                                                                                              | 1,379,500 |           |
| #19       | “mental health” OR “mental illness” OR “mental disorder” OR “psychiatric disorder” OR depression OR anxiety OR “baby blues” OR psychosis OR “bipolar disorder” [TIAB] | 636,389   |           |
| #20       | #18 OR #19                                                                                                                                                            | 1,646,556 | Concept 3 |
| #21       | #8 AND #13 AND #20<br>(Without Filter)                                                                                                                                | 7,079     |           |
| #23       | #8 AND #13 AND #20<br>(With filter) <ul style="list-style-type: none"> <li>English and German</li> </ul>                                                              | 6,685     |           |

### 3. CINAHL SEARCH TERMS

| No.       | Term                    | Hits (date: 01.09.2020) |  |
|-----------|-------------------------|-------------------------|--|
| CONCEPT 1 |                         |                         |  |
| #1        | MH “Health Literacy”    | 4,198                   |  |
| #2        | MH “Health Knowledge”   | 30,437                  |  |
| #3        | MH “Health Beliefs”     | 13,581                  |  |
| #4        | MH “Health education”   | 26,299                  |  |
| #5        | MH “Attitude to health” | 43,741                  |  |

|           |                                                                                                                                                                     |         |           |
|-----------|---------------------------------------------------------------------------------------------------------------------------------------------------------------------|---------|-----------|
| #6        | MH "Help Seeking Behavior"                                                                                                                                          | 6,804   |           |
| #7        | #1 OR #2 OR #3 OR #4 OR #5 OR #6                                                                                                                                    | 113,233 |           |
| #8        | "Mental health literacy" OR "Health literacy" OR literacy OR knowledge OR attitude* OR belief* OR stigma* OR "help-seek*" [AB]                                      | 293,937 |           |
| #9        | #7 OR #8                                                                                                                                                            | 364,259 | Concept 1 |
| CONCEPT 2 |                                                                                                                                                                     |         |           |
| #10       | MH "Postnatal Period"                                                                                                                                               | 9,240   |           |
| #11       | MH "Pregnancy"                                                                                                                                                      | 199,448 |           |
| #12       | #10 OR #11                                                                                                                                                          | 203,439 |           |
| #13       | prenatal OR antenatal OR pregnancy OR "before birth" OR postnatal OR postpartum OR "after birth" OR peripartum OR perinatal [AB]                                    | 129,635 |           |
| #14       | #12 OR #13                                                                                                                                                          | 252,475 | Concept 2 |
| CONCEPT 3 |                                                                                                                                                                     |         |           |
| #15       | MH "Depression"                                                                                                                                                     | 107,054 |           |
| #16       | MH "Anxiety"                                                                                                                                                        | 43,145  |           |
| #17       | MH "Mental Disorders"                                                                                                                                               | 57,678  |           |
| #18       | MH "Mental Health"                                                                                                                                                  | 36,848  |           |
| #19       | #15OR#16 OR #17 OR #18                                                                                                                                              | 210,847 |           |
| #20       | "mental health" OR "mental illness" OR "mental disorder" OR "psychiatric disorder" OR depression OR anxiety OR "baby blues" OR psychosis OR "bipolar disorder" [AB] | 226,663 |           |
| #21       | #19 OR #20                                                                                                                                                          | 332,673 | Concept 3 |
| #22       | #9 AND #14 AND #21<br>(Without Filter)                                                                                                                              | 1,822   |           |
| #23       | #9 AND #14 AND #21<br>(With filter) <ul style="list-style-type: none"> <li>• English and German</li> </ul>                                                          | 1,768   |           |

#### 4. PSYCINFO SEARCH TERMS

| No.       | Term                        | Hits (date: 01.09.2020) |  |
|-----------|-----------------------------|-------------------------|--|
| CONCEPT 1 |                             |                         |  |
| #1        | DE "Mental Health Literacy" | 443                     |  |
| #2        | DE "Health Literacy"        | 3,508                   |  |
| #3        | DE "Health Knowledge"       | 7,780                   |  |

|           |                                                                                                                                                                     |               |           |
|-----------|---------------------------------------------------------------------------------------------------------------------------------------------------------------------|---------------|-----------|
| #4        | DE "Health Attitudes"                                                                                                                                               | 10,321        |           |
| #5        | DE "Help Seeking Behavior"                                                                                                                                          | 5,659         |           |
| #6        | #1 OR #2 OR #3 OR #4 OR #5                                                                                                                                          | 25,489        |           |
| #7        | Mental health literacy OR Health literacy OR literacy OR knowledge OR attitude* OR belief* OR stigma* OR "help-seek* [AB]                                           | 589,204       |           |
| #8        | #7 OR #8                                                                                                                                                            | 597,575       | Concept 1 |
| CONCEPT 2 |                                                                                                                                                                     |               |           |
| #9        | DE "Postnatal Period"                                                                                                                                               | <b>4,756</b>  |           |
| #10       | DE "Pregnancy"                                                                                                                                                      | <b>45,675</b> |           |
| #11       | DE "Perinatal Period"                                                                                                                                               | <b>2,907</b>  |           |
| #12       | #10 OR #11 OR #12                                                                                                                                                   | 50,254        |           |
| #13       | prenatal OR antenatal OR pregnancy OR "before birth" OR postnatal OR postpartum OR "after birth" OR peripartum OR perinatal [AB ]                                   | 76,167        |           |
| #14       | #12 OR # 13                                                                                                                                                         | 91,042        | Concept 2 |
| CONCEPT 3 |                                                                                                                                                                     |               |           |
| #15       | DE "Major Depression"                                                                                                                                               | 124,310       |           |
| #16       | DE "Anxiety"                                                                                                                                                        | 80,898        |           |
| #17       | DE "Mental Disorders"                                                                                                                                               | 131,002       |           |
| #18       | DE "Mental Health"                                                                                                                                                  | 73,282        |           |
| #19       | #16 OR #17 OR #18 OR #19                                                                                                                                            | 368,894       |           |
| #20       | "mental health" OR "mental illness" OR "mental disorder" OR "psychiatric disorder" OR depression OR anxiety OR "baby blues" OR psychosis OR "bipolar disorder" [AB] | 565,836       |           |
| #21       | #20 OR #21                                                                                                                                                          | 673,404       | Concept 3 |
| #22       | #8 AND #14 AND #21<br>(Without Filter)                                                                                                                              | 1,988         |           |
| #23       | #8 AND #14 AND #21<br>(With filter) <ul style="list-style-type: none"> <li>• English and German</li> </ul>                                                          | 1,902         |           |
