# Supplementary material for: Perinatal mental health literacy: knowledge, attitudes, and help-seeking among perinatal women and the public – a systematic review
Source: Springer Nature journal article supplement (doi:10.1186/s12884-022-04865-y), 2022-07-19
Supplement: MOESM3 [file 23283228]

Perinatal mental health literacy: Knowledge, attitudes, and help-seeking among perinatal women and the public – a systematic review

**Critical appraisal of the included cohort and case control studies using the QATSQ tool for non-randomized studies.**

| Author             | Selection bias                                                                                 | Study design                                              | Confounders                                                                                                           | Blinding <sup>a</sup>                                            | Data collection                                        | Withdrawals and dropouts                                                                                         | Summary          |
|--------------------|------------------------------------------------------------------------------------------------|-----------------------------------------------------------|-----------------------------------------------------------------------------------------------------------------------|------------------------------------------------------------------|--------------------------------------------------------|------------------------------------------------------------------------------------------------------------------|------------------|
| Logsdon 2018b [76] | <sup>3</sup> Participants are not likely to be representative, response rate was not described | <sup>2</sup> Study is designated as cohort analytic study | <sup>1</sup> Confounders (age, ethnicity, health status, education) were similar across pre and post-test groups      | <sup>2</sup> Blinding not described                              | <sup>1</sup> Tools were shown to be valid and reliable | <sup>1</sup> There was a 96.9-97.9% follow-up rate from those that consented and completed the intervention.     | Moderate quality |
| Small 1994 [79]    | <sup>2</sup> Participants are somewhat likely to be representative, response rate was 71.5%    | <sup>2</sup> Study is designated as a case control study  | <sup>3</sup> Confounders across cases and controls not described                                                      | <sup>2</sup> Participants are not aware of the research question | <sup>1</sup> Tools were shown to be valid and reliable | <sup>1</sup> There was a 37.8% follow-up rate from those that consented and scored as depressed after childbirth | Moderate quality |
| Bina 2014 [68]     | <sup>3</sup> Participants are not likely to be representative, response rate was not described | <sup>2</sup> Study is designated as a cohort study        | <sup>1</sup> Confounders were similar across follow-up sample and initial sample                                      | -                                                                | <sup>1</sup> Tools were shown to be valid and reliable | <sup>1</sup> 94% of women screening positive at 6-weeks postpartum participated at a 6-month follow-up           | Moderate Quality |
| O'Mahen 2009 [42]  | <sup>3</sup> Participants are not likely to be representative, response rate was 53.9%         | <sup>2</sup> Study is designated as a cohort study        | <sup>1</sup> Confounders (marital status, age, health status) were similar across follow-up sample and initial sample | -                                                                | <sup>1</sup> Tools were shown to be valid and reliable | <sup>1</sup> There was a 73% 6-week postpartum follow-up rate from those that consented                          | Moderate Quality |

The Qualitative Assessment Tool for Quantitative Studies (QATSQ) assesses the domains selection bias, study design, confounding bias, blinding, data collection method and withdrawal/drop-out bias and rates them as weak, moderate or strong; <sup>a</sup>The component 'blinding of outcome assessors and participants' was considered not applicable for observational studies in this review; <sup>1</sup> Strong rating; <sup>2</sup> Moderate rating; <sup>3</sup> Weak rating; Strong quality (no weak ratings); Moderate quality (one weak rating); Weak quality (two or more weak ratings); Studies with weak quality were removed from this review.

### Critical appraisal of the included RCT studies using the Cochrane Collaboration's Tool

| Author                  | Selection Bias                              |                                                                        | Performance bias                                                                                                                                                                | Detection bias                                                                                  | Attrition bias                                                                                                                       | Reporting bias                                                            | Summary of overall accumulative risk |
|-------------------------|---------------------------------------------|------------------------------------------------------------------------|---------------------------------------------------------------------------------------------------------------------------------------------------------------------------------|-------------------------------------------------------------------------------------------------|--------------------------------------------------------------------------------------------------------------------------------------|---------------------------------------------------------------------------|--------------------------------------|
|                         | Random sequence generation                  | Allocation concealment                                                 | Blinding of participants and personnel                                                                                                                                          | Blinding of outcome assessment                                                                  | Incomplete outcome data                                                                                                              | Selective reporting                                                       |                                      |
| Holt 2017 [74]          | <sup>a</sup> Automated computer system used | <sup>a</sup> Allocation schedule produced by an independent researcher | <sup>a</sup> Given the nature of the intervention, Maternal and Child Health Nurses could not be blinded beyond allocation; women were blind to the intervention they received. | <sup>a</sup> The research assistant who collected outcome data was blind                        | <sup>a</sup> Scores for the observed cases were compared to those of missing cases in terms of the main outcomes at each time point. | <sup>a</sup> All primary outcomes were reported                           | Low risk of bias                     |
| Thorsteinsson 2018 [80] | <sup>a</sup> Qualtrics software was used    | <sup>b</sup> Unclear who performed randomisation                       | <sup>b</sup> Unclear if blinding was performed                                                                                                                                  | <sup>b</sup> Unclear whether assessors had knowledge of treatment groups when assessing effects | <sup>a</sup> Missing values were replaced using the replace missing values, series mean method                                       | <sup>a</sup> All outcomes measures were reported, along with effect sizes | Unclear risk of bias                 |

The Cochrane Collaboration's Tool comprises 5 domains of potential bias (selection, performance, detection, attrition and reporting bias). Each domain is judged as high risk of bias, unclear risk of bias or low risk of bias. <sup>a</sup> Low risk of bias rating; <sup>b</sup> Unclear risk of bias rating; <sup>c</sup> High risk of bias rating; Overall low risk of bias (across all domains low risk is scored); Overall unclear risk of bias (across all domains low or unclear risk of bias is scored); Overall high risk of bias (if one or more domains scored high risk of bias).

**Critical appraisal of the included cross-sectional studies using the NOS tool.**

| Authors                            | Selection                                                                                                                                                                                                                                                                                                                                                               |                                                                                                                                        |                                                                                                                                                                                                                                                   |                                                                                                                                                                                                                                                                                    | Outcome                                                                                                                               |                                                                                                                                                                                                                                                                              | Summary |
|------------------------------------|-------------------------------------------------------------------------------------------------------------------------------------------------------------------------------------------------------------------------------------------------------------------------------------------------------------------------------------------------------------------------|----------------------------------------------------------------------------------------------------------------------------------------|---------------------------------------------------------------------------------------------------------------------------------------------------------------------------------------------------------------------------------------------------|------------------------------------------------------------------------------------------------------------------------------------------------------------------------------------------------------------------------------------------------------------------------------------|---------------------------------------------------------------------------------------------------------------------------------------|------------------------------------------------------------------------------------------------------------------------------------------------------------------------------------------------------------------------------------------------------------------------------|---------|
|                                    | Representativeness of the sample (sampling method)<br>a. Truly representative of the average in the target population. * (all subjects or random sampling)<br>b. Somewhat representative of the average in the target group. * (non-random sampling)<br>c. Selected group of users/convenience sample.<br>d. No description of the derivation of the included subjects. | Sample size<br>a. Justified and satisfactory (including sample size calculation). *<br>b. Not justified.<br>c. No information provided | Response rate (%)<br>a. The minimum satisfactory response rate was defined as 60% for paper-based surveys and 30% for web based surveys*<br>b. Unsatisfactory recruitment rate, no summary data on non-respondents.<br>c. No information provided | Ascertainment of the exposure (risk factors: history of mental illness /current mental illness)<br>a) Validated measurement tool. **,<br>b) Non-validated measurement tool, but the tool is available or described *,<br>c) No description of the measurement tool / not measured. | Assessment of the outcome<br>a)Independent blind assessment. **,<br>b) Record linkage. **,<br>c) Self report. * and d) No description | Statistical test<br>a. Statistical test used to analyse the data clearly described, appropriate and measures of association presented including confidence intervals and probability level (p value). *<br>b. Statistical test not appropriate, not described or incomplete. |         |
| Ayres 2019 [67]                    | c                                                                                                                                                                                                                                                                                                                                                                       | Not justified                                                                                                                          | a* (71%)                                                                                                                                                                                                                                          | b*                                                                                                                                                                                                                                                                                 | Self-report*                                                                                                                          | described*                                                                                                                                                                                                                                                                   | 4       |
| Azale 2016 [40]                    | b*                                                                                                                                                                                                                                                                                                                                                                      | Not justified                                                                                                                          | a* (100%)                                                                                                                                                                                                                                         | a**                                                                                                                                                                                                                                                                                | Self-report*                                                                                                                          | described*                                                                                                                                                                                                                                                                   | 6       |
| Barrera 2015 [33]                  | c                                                                                                                                                                                                                                                                                                                                                                       | Not justified                                                                                                                          | b (26.38%)                                                                                                                                                                                                                                        | a**                                                                                                                                                                                                                                                                                | Self-report*                                                                                                                          | described*                                                                                                                                                                                                                                                                   | 4       |
| Branquinho 2019 [26] <sup>a</sup>  | c                                                                                                                                                                                                                                                                                                                                                                       | Not justified                                                                                                                          | c                                                                                                                                                                                                                                                 | b*                                                                                                                                                                                                                                                                                 | Self-report*                                                                                                                          | described*                                                                                                                                                                                                                                                                   | 3       |
| Branquinho 2020* [53] <sup>a</sup> | c                                                                                                                                                                                                                                                                                                                                                                       | Not justified                                                                                                                          | c                                                                                                                                                                                                                                                 | b*                                                                                                                                                                                                                                                                                 | Self-report*                                                                                                                          | Described*                                                                                                                                                                                                                                                                   | 3       |
| Buist 2005[30]                     | c                                                                                                                                                                                                                                                                                                                                                                       | Not justified                                                                                                                          | b (46%)                                                                                                                                                                                                                                           | a**                                                                                                                                                                                                                                                                                | Self-report*                                                                                                                          | Described*                                                                                                                                                                                                                                                                   | 5       |

|                                  |    |                                          |                             |     |              |            |   |
|----------------------------------|----|------------------------------------------|-----------------------------|-----|--------------|------------|---|
| Buist 2007 [20]                  | c  | Not justified                            | b (57%)                     | a** | Self-report* | Described* | 4 |
| DaCosta 2018 [38]                | c  | Not justified                            | a* (55.4%; internet survey) | a** | Self-report* | Described* | 4 |
| Dunford 2017 [37]                | c  | Not justified                            | a* (77%; internet survey)   | a** | Self-report* | Described* | 5 |
| Fonseca 2017 [69] <sup>a</sup>   | c  | Not justified                            | c                           | a** | Self-report* | Described* | 4 |
| Fonseca 2015 [39] <sup>a</sup>   | c  | Not justified                            | c                           | a** | Self-report* | Described* | 4 |
| Fonseca 2018 [70] <sup>a</sup>   | c  | Not justified                            | c                           | a** | Self-report* | Described* | 4 |
| Ford 2019 [71]                   | c  | Not justified                            | c                           | a** | Self-report* | Described* | 4 |
| Goodman 2009[34]                 | c  | Not justified                            | c                           | a** | Self-report* | Described* | 4 |
| Goodman 2013 [72]                | c  | Not justified                            | c                           | a** | Self-report* | Described* | 4 |
| Henshaw 2013 [73]                | c  | Not justified                            | c                           | a** | Self-report* | Described* | 4 |
| Highet 2011 [18]                 | a* | Not justified                            | 13%                         | c   | Self-report* | Described* | 3 |
| Kim 2010 [41]                    | c  | Justified but no sample size calculation | c                           | a** | Self-report* | Described* | 4 |
| Kingston 2014a [75] <sup>a</sup> | a* | Not justified                            | 27.6%                       | c   | Self-report* | Described* | 3 |
| Kingston 2014b [17] <sup>a</sup> | a* | Not justified                            | 27.6%                       | c   | Self-report* | Described* | 3 |
| Logsdon 2018a [43]               | c  | Not justified                            | c                           | a** | Self-report* | Described* | 4 |

|                             |    |                           |         |     |              |            |   |
|-----------------------------|----|---------------------------|---------|-----|--------------|------------|---|
| Mirsalimi 2020 [47]         | c  | Justified and calculated* | c       | c   | Self-report* | Described* | 3 |
| O'Mahen 2008 [77]           | c  | Not justified             | 62%*    | a** | Self-report* | Described* | 5 |
| Patel 2011 [78]             | c  | Not justified             | 39%*    | b*  | Self-report* | Described* | 4 |
| Prevatt 2018 [59]           | c  | Not justified             | 73%*    | a** | Self-report* | Described* | 5 |
| Ride 2016 [31] <sup>b</sup> | c  | justified                 | c       | c   | Self-report* | Described* | 3 |
| Sealy 2009 [19]             | b* | Not justified             | 57-62%* | c   | Self-report* | Described* | 4 |
| Sleath 2005 [35]            | c  | Not justified             | 91%*    | a** | Self-report* | Described* | 5 |
| Smith 2019 [28]             | b* | Not justified             | c       | c   | Self-report* | Described* | 3 |
| Thorsteinsson 2014 [29]     | c  | Not justified             | c       | a*  | Self-report* | Described* | 3 |
| Wenze 2018 [36]             | c  | Not justified             | c       | a** | Self-report* | Described* | 4 |
| Zittel-Palamara 2008 [32]   | c  | Not justified             | c       | b*  | Self-report* | Described* | 3 |

The Newcastle-Ottawa Scale (NOS) assesses three domains of bias: selection, comparability and outcome biases. As all included cross-sectional studies were descriptive studies, the comparability section was omitted in this review, resulting in 2 domains with a maximum of 8 points. Studies below 2 points were considered to indicate poor quality, 3-6 points considered to indicate fair quality and more than seven points are considered to indicate good quality; \* one score obtained; \*\* two score obtained; Good quality (score of  $\geq 7$ ); Fair quality (score 3 to 6); Poor quality (score of  $\leq 2$ ); Studies with poor quality were removed from this review; <sup>a</sup>same sample used in more than one paper; <sup>b</sup>cross-sectional internet survey including a discrete choice experiment.
